1 **NusG links transcription and translation in *Escherichia coli* extracts**

2

3 Elizabeth J. Bailey<sup>1,2</sup>, Max E. Gottesman<sup>3,\*</sup>, and Ruben L. Gonzalez, Jr.<sup>1,\*</sup>

4

5 <sup>1</sup>*Department of Chemistry, Columbia University, 3000 Broadway, MC3126, New York, NY*  
6 *10027, USA*

7 <sup>2</sup>*Current Address: Center for Research on Learning and Teaching in Engineering, University of*  
8 *Michigan, 2609 Draper Drive, Ann Arbor, MI 48109, USA*

9 <sup>3</sup>*Department of Microbiology and Immunology, Columbia University Medical Center, 701 West*  
10 *168 Street, New York, NY 10032, USA*

11

12 \*To whom correspondence should be addressed: Max E. Gottesman, Department of  
13 Microbiology and Immunology, Columbia University Medical Center, 701 West 168 Street, New  
14 York, NY 10032 USA Tel.: (212) 305-6900; Fax: (212) 305-1468; Email:  
15 [meg8@cumc.columbia.edu](mailto:meg8@cumc.columbia.edu) and Ruben L. Gonzalez, Jr., Department of Chemistry, Columbia  
16 University, 3000 Broadway, MC3126, New York, NY 10027, USA, Tel.: (212) 854-1096; Fax:  
17 (212) 932-1289; Email: [rlg2118@columbia.edu](mailto:rlg2118@columbia.edu)

Bailey E.J., *et al.*

18 **Abstract**

19 In bacteria, transcription is coupled to, and can be regulated by, translation. Although recent  
20 structural studies suggest that the N-utilization substance G (NusG) transcription factor can  
21 serve as a direct, physical link between the transcribing RNA polymerase (RNAP) and the lead  
22 ribosome, mechanistic studies investigating the potential role of NusG in mediating  
23 transcription-translation coupling are lacking. Here, we report development of a cellular extract-  
24 and reporter gene-based, *in vitro* biochemical system that supports transcription-translation  
25 coupling as well as the use of this system to study the role of NusG in coupling. Our findings  
26 show that NusG is required for coupling and that the enhanced gene expression that results  
27 from coupling is dependent on the ability of NusG to directly interact with the lead ribosome.  
28 Moreover, we provide strong evidence that NusG-dependent coupling enhances gene  
29 expression through a mechanism in which the lead ribosome that is tethered to the RNAP by  
30 NusG suppresses spontaneous backtracking of the RNAP on its DNA template that would  
31 otherwise inhibit transcription.

32

33 **Keywords**

34 Transcription-translation coupling | NusG | RNA polymerase | ribosome | cellular extracts

Bailey E.J., *et al.*

## 35 **Introduction**

36 In 2010 Proshkin *et al.* showed not only that the rates of transcription and translation match in  
37 bacteria, as was widely accepted, but that the rate of translation influenced the rate of  
38 transcription [1]. Conceptually, this is fascinating, as it suggests that transcription and translation  
39 do not proceed in a purely sequential manner, but rather that there is regulatory communication,  
40 of some sort, between the two processes such that the second process, translation, has control  
41 over the first process, transcription.

42 Contemporaneously with Proshkin *et al.*'s report, Burmann *et al.* proposed a structure-  
43 based, molecular mechanism for the possible communication between transcription and  
44 translation (*i.e.*, transcription-translation coupling) [2]. Specifically, they presented structural  
45 evidence that the carboxy (C)-terminal domain (CTD) of the 21 kDa N-utilization substance  
46 (Nus) G transcription factor can physically interact with ribosomal protein uS10. Moreover, the  
47 surface of uS10 with which the NusG CTD was shown to interact is solvent exposed and  
48 available within the context of the ribosomal small, or 30S, subunit, suggesting that the NusG  
49 CTD can directly interact with the 30S subunit and an intact, translating 70S ribosome. Notably,  
50 a flexible, 15-amino acid linker connects the NusG CTD to the amino (N)-terminal domain (NTD)  
51 of NusG, a domain that was already known to directly interact with RNA polymerase (RNAP) [3].  
52 Taken together, these data suggested a model in which NusG could simultaneously bind the  
53 transcribing RNAP and the translating lead ribosome, physically linking the two processes.

54 Physical tethering of RNAP to the ribosome by NusG is further supported by biochemical  
55 and structural studies of NusG binding to the 70S ribosome [4, 5], as well as to both RNAP and  
56 the 70S ribosome within the context of transcription-translation complexes [4, 6-8]. Structural  
57 analysis of transcription-translation complexes assembled from purified components on  
58 relatively long mRNAs in which NusG is observed to tether RNAP to the 70S ribosome show  
59 that the NusG NTD contacts the  $\beta'$  and  $\beta$  subunits of RNAP, while the NusG CTD contacts the  
60 solvent-accessible surface of uS10 within the 30S subunit of the 70S ribosome [6, 7]. One of the

Bailey E.J., *et al.*

61 structures further suggests that the NusA transcription elongation factor participates in the  
62 complex [7], a finding that is supported by a recent, in-cell, cryogenic electron tomography study  
63 [8]. In structures of transcription-translation complexes analogously assembled on relatively  
64 shorter mRNAs, NusG is excluded from the complex and a direct link between RNAP and the  
65 70S ribosome is observed [6, 7]. Notably, the relative orientation of RNAP and the 70S  
66 ribosome observed in the structure of an RNAP-70S ribosome complex formed by colliding a  
67 translating 70S ribosome into a stalled RNAP in the absence of NusG [9] is consistent with that  
68 observed in the structures of transcription-translation complexes assembled on relatively short  
69 mRNAs [6, 7]. In contrast, the relative orientation of RNAP and the 70S ribosome inferred from  
70 biochemical experiments [10] and observed in a structure [11] of RNAP-70S ribosome  
71 complexes assembled in the absence of either mRNA and NusG is inconsistent with that  
72 observed for any of the transcription-translation complexes [4, 6-8].

73         As the previous paragraph demonstrates, the recent, spectacular progress in our  
74 understanding of the structural basis of transcription-translation coupling has generated a  
75 number of compelling, structure-based mechanistic hypotheses regarding the mechanism of  
76 transcription-translation coupling and its role in regulating gene expression. Unfortunately,  
77 however, a paucity in the availability of *in vitro* experimental systems allowing full biochemical  
78 control over the factors that mediate transcription-translation coupling has thus far limited  
79 comprehensive testing of these hypotheses. To address these technological and knowledge  
80 gaps, here we report the development of such an *in vitro* biochemical system and the use of this  
81 system to study the role of NusG in transcription-translation coupling. Specifically, we have used  
82 *Escherichia coli* S30 cellular extracts and a luciferase reporter gene construct to develop an *in*  
83 *vitro* biochemical system that preserves the coupling between transcription and translation.  
84 Addition of a DNA template encoding luciferase to the S30 extracts enables us to conduct  
85 transcription-translation reactions, whereas addition of a separately and independently *in vitro*  
86 transcribed mRNA encoding luciferase permits us to decouple translation from transcription and

Bailey E.J., *et al.*

87 perform translation-only reactions. Importantly, this system allows us to control the presence,  
88 identities, and concentrations of factors mediating transcription-translation coupling, thereby  
89 allowing us to test structure-based hypotheses, investigate the mechanism of transcription-  
90 translation coupling, and elucidate the molecular consequences of uncoupling transcription from  
91 translation. Using this system in combination with wildtype and mutant variants of NusG and  
92 RNAP, we have investigated the role that NusG-mediated tethering of RNAP to the lead  
93 ribosome plays in transcription-translation coupling and the mechanism through which such  
94 tethering allows the rate of translation to influence the rate of transcription. The results we  
95 present here provide strong evidence supporting a mechanistic model in which tethering of  
96 RNAP to the lead ribosome by NusG increases the efficiency of gene expression through a  
97 mechanism in which the tethered lead ribosome suppresses backtracking of RNAP that would  
98 otherwise impair transcription.

99 We began our work by attempting to generate an *E. coli* S30 cellular extract that would  
100 completely lack endogenous NusG such that it could serve as a standard extract to which we  
101 could add exogenously overexpressed and purified NusG proteins and perform transcription-  
102 translation and translation-only reactions. We were motivated to generate such an S30 extract  
103 based on previously published *in vivo* cell biology studies showing that *E. coli* strains in which  
104 the gene encoding NusG, *nusG*, had been deleted are viable, albeit extremely slow growing [12,  
105 13]. Following up on these previous studies, we performed *in vivo* cell biology experiments  
106 using a *nusG* deletion strain prepared in an *E. coli* MDS42 background (Supplementary  
107 Materials and Methods). Providing a rationale for the previously observed extremely slow  
108 growth phenotype [12, 13], this strain expressed 10-fold less  $\beta$ -galactosidase than a wildtype  
109 MDS42 strain, a defect that could be fully complemented by expression of a plasmid-borne copy  
110 of wildtype *nusG* (Supplementary Figure S1). Based on the ability of plasmid-based expression  
111 of NusG to complement the lack of endogenously expressed NusG, we generated an *E. coli*  
112 MG1655-based strain in which *nusG* had been deleted (MG1655  $\Delta$ *intR-kilR*::*Cam*<sup>R</sup>

Bailey E.J., *et al.*

113 *nusG::Kan<sup>R</sup>*), hereafter referred to as the *nusG* knock-out (KO) strain (Materials and Methods).  
114 Western blot analyses against the  $\beta'$  subunit of RNAP and ribosomal protein S3 established that  
115 the RNAP and ribosome content of S30 extracts prepared from the *nusG* KO strain was similar  
116 to that of S30 extracts prepared from the wildtype MG1655 parent strain (MG1655  $\Delta$ *intR-*  
117 *killR::Cam<sup>R</sup>*; Supplementary Materials and Methods and Supplementary Figure S2).

118 Using a circularized DNA plasmid encoding the firefly luciferase gene downstream from  
119 a *tac* promoter and a ribosome binding site (pBESTluc, Promega) as a template, we next  
120 measured the luminescence activity of the luciferase expressed in transcription-translation  
121 reactions performed in S30 extracts prepared from the *nusG* KO strain (Materials and Methods).  
122 Initial experiments resulted in luciferase activities that were 5-fold lower than analogous  
123 experiments performed in identically prepared S30 extracts from the wildtype MG1655 parent  
124 strain. Given our *in vivo* results (Supplementary Figure S1), we were surprised to observe that  
125 addition of purified wildtype NusG (NusG-WT) (a kind gift from Prof. Paul Röche, University of  
126 Bayreuth) to the reactions did not restore the luciferase activity (Supplementary Figure S3).  
127 Collectively, these results strongly suggest that *nusG* KO extract is deficient in luciferase  
128 expression and that this defect is irreversible in our *in vitro* transcription-translation system.

129 In an attempt to identify the molecular basis for the irreversible defect in luciferase  
130 expression that we observed in the *nusG* KO S30 extracts, we performed next-generation RNA  
131 sequencing (RNA-Seq) of the *nusG* KO strain and, as a reference, the wildtype MG1655 parent  
132 strain, in order to identify mRNAs whose cellular populations were up- or down-regulated upon  
133 deletion of *nusG* (Supplementary Materials and Methods). The results showed that the  
134 populations of a number of mRNAs encoding proteins with direct or indirect roles in translation  
135 were significantly deregulated in the *nusG* KO strain (Supplementary Tables S1 and S2). Thus,  
136 the *nusG* KO strain likely harbors pleiotropic defects in translation, explaining why simple  
137 addition of purified NusG-WT to the *nusG* KO extract could not rescue luciferase expression.  
138 Consistent with this interpretation, experiments in which an mRNA that had been *in vitro*

Bailey E.J., *et al.*

139 transcribed from the pBESTluc plasmid was directly added to *in vitro* translation-only reactions  
140 performed in S30 extract prepared from the *nusG* KO strain showed that luciferase activity  
141 remained extremely low, confirming that S30 extracts prepared from the *nusG* KO strain were  
142 defective in translation (Supplementary Figure S4).

143         Given we could not generate a standard extract lacking NusG without introducing  
144 pleiotropic translation defects, we instead used the wildtype MG1655 parent strain to generate  
145 an S30 extract containing endogenous levels of NusG-WT, hereafter referred to simply as  
146 'standard extract' (Materials and Methods). Addition of excess concentrations of purified NusG-  
147 WT or mutant NusG proteins to standard extract would then allow us to assess the effects of  
148 these proteins on the *in vitro* transcription-translation and translation-only activities of S30  
149 extracts containing an endogenous level of NusG-WT (*i.e.*, how the added proteins modulate  
150 and/or compete with the endogenous level of NusG-WT).

151         To investigate the role of NusG in coupling translation to transcription, we first tested  
152 how addition of 1  $\mu$ M of NusG-WT or each of two previously reported, purified mutant NusG  
153 proteins (a kind gift from Prof. Röche) to standard extract affected the luciferase activities of  
154 transcription-translation or translation-only reactions (Figure 1). The first mutant NusG protein is  
155 a truncation mutant in which the CTD has been deleted (NusG-NTD) such that the mutant  
156 protein is no longer capable of bridging RNAP and uS10 (5, 6). The second is a substitution  
157 mutant in which the phenylalanine at residue position 165 within the NusG CTD has been  
158 mutated to an alanine (NusG-F165A) (5, 6). Phenylalanine 165 is a NusG CTD residue that is  
159 highly conserved across bacteria [2, 5], forms part of its uS10-interacting surface (5, 6), and  
160 whose mutation to alanine we have previously shown disrupts the interaction of the NusG CTD  
161 with uS10 [2]. Notably, we have previously reported nuclear magnetic resonance (NMR)  
162 spectroscopy [2, 14] and *in vitro* transcription [5] studies demonstrating that these NusG-WT,  
163 NusG-NTD, and NusG-F165A proteins are properly folded and exhibit the expected biochemical  
164 activities. Consistent with this, we have also reported cell biology studies suggesting that NusG-

Bailey E.J., *et al.*

165 NTD, and, by extension, NusG-F165A, compete with NusG-WT for binding to RNAP [3]  
166 (Materials and Methods).

167 To analyze the results of these experiments, we calculated the % relative luciferase  
168 activity of each transcription-translation or translation-only reaction, given as [(luciferase activity  
169 of the reaction performed in standard extract in the absence of added NusG proteins or in the  
170 presence of NusG-WT, NusG-NTD, or NusG-F165A proteins, as designated) / (luciferase  
171 activity of a corresponding 'reference' reaction analogously performed in standard extract in the  
172 absence of added NusG proteins) × 100] (Materials and Methods). Addition of NusG-WT to  
173 transcription-translation and translation-only reactions resulted in a % relative luciferase activity  
174 of  $103 \pm 17$  % and  $119 \pm 42$  %, respectively. These results suggest that addition of NusG-WT  
175 does not significantly alter the expression of luciferase in either transcription-translation or  
176 translation-only reactions performed in standard extract. In contrast, the % relative luciferase  
177 activities of added NusG-NTD or NusG-F165A in transcription-translation reactions were  
178 significantly decreased, to  $34 \pm 3$  % and  $28 \pm 4$  %, respectively, indicating that addition of NusG-  
179 NTD or NusG-F165A markedly reduces expression of luciferase in transcription-translation  
180 reactions performed in standard extract. Notably, the % relative luciferase activities of added  
181 NusG-NTD or NusG-F165A in translation-only reactions were  $106 \pm 28$  % and  $126 \pm 20$  %,   
182 respectively, suggesting that addition of NusG-NTD or NusG-F165A does not significantly alter  
183 translation of the luciferase-encoding mRNA.

184 The fact that added NusG-NTD and NusG-F165A decrease the expression of luciferase  
185 in transcription-translation reactions but have no effect on the expression of luciferase in  
186 translation-only reactions indicates that the interaction between the NusG CTD and uS10 within  
187 the ribosome, and, presumably, the attendant coupling of RNAP to the lead ribosome, is  
188 necessary for robust synthesis of the luciferase-encoding mRNA. Furthermore, assuming that  
189 NusG-F165A inhibits transcription through the same mechanism as NusG-NTD (*i.e.*, through

Bailey E.J., *et al.*

190 abrogating the NusG CTD-uS10 interaction and RNAP-ribosome coupling), the fact that NusG-  
191 F165A exhibited as strong an inhibition as NusG-NTD confirms that the F165A substitution  
192 effectively disrupts the interaction of the NusG CTD with uS10 and therefore the coupling of  
193 RNAP to the lead ribosome in an *in vitro* cellular extract system. This is consistent with results  
194 from Saxena *et al.* demonstrating that the F165A substitution completely disrupted binding of  
195 NusG to ribosomes *in vitro* and significantly weakened the affinity of NusG for ribosomes *in vivo*  
196 [5]. The present results indicate that the F165A substitution mutation disrupts transcription as  
197 effectively as a full deletion of the NusG CTD.

198         There are two likely ways in which NusG-NTD and NusG-F165A could disrupt RNAP-  
199 ribosome coupling and inhibit transcription. The first is by allowing uncoupled RNAP to outpace  
200 the lead ribosome, generating naked mRNA that becomes available to the Rho transcription  
201 termination factor and permits premature, Rho-dependent transcription termination. The second  
202 is by allowing uncoupled RNAP to fall into long pauses and backtrack on the DNA template,  
203 effectively inhibiting transcription. To test for Rho-dependent termination, we asked if  
204 bicyclomycin (BCM), an antibiotic that selectively inhibits Rho [12, 15, 16], could rescue the  
205 inhibition of transcription induced by addition of 1  $\mu$ M NusG-F165A to the standard extract used  
206 in transcription-translation reactions (Figure 2). The results of these experiments showed that  
207 titrating BCM over two orders of magnitude, from 0–700  $\mu$ M, did not significantly restore  
208 luciferase activity in standard extract with 1  $\mu$ M added NusG-F165A protein. Thus, premature  
209 transcription termination by Rho does not account for the failure to synthesize the luciferase  
210 mRNA in the absence of NusG-mediated RNAP-ribosome coupling.

211         We next asked if RNAP backtracking was responsible for the inhibition of luciferase  
212 mRNA synthesis by NusG-NTD or NusG-F165A. Accordingly, we performed transcription-  
213 translation reactions in an S30 extract generated from an *E. coli* MG1655-based strain carrying  
214 an RNAP that exhibits reduced backtracking. Specifically, this extract was generated from a  
215 strain harboring a substitution mutation in which the histidine at residue position 1244 of the  $\beta$

Bailey E.J., *et al.*

216 subunit of RNAP has been mutated to a glutamine (MG1655  $\Delta intR-kilR::Cam^R rpoB^{*35}$ ),  
217 hereafter referred to as the  $rpoB^{*35}$  strain and extract. The H1244Q substitution mutation in the  
218  $\beta$  subunit of RNAP has been previously shown to suppress RNAP backtracking [17, 18].

219 The results shown in Figure 3 demonstrate that transcription-translation reactions  
220 performed in  $rpoB^{*35}$  extract are significantly more resistant to NusG-NTD- and NusG-F165A-  
221 mediated disruption of RNAP-ribosome coupling and consequent inhibition of transcription than  
222 transcription-translation reactions performed in standard extract. Specifically, the % relative  
223 luciferase activities measured for transcription-translation reactions performed in  $rpoB^{*35}$   
224 extract with 1  $\mu$ M added NusG-NTD or NusG-F165A were  $65 \pm 10$  % and  $92 \pm 17$  %,   
225 respectively, compared to  $34 \pm 3$  % and  $28 \pm 4$  %, respectively, for the analogous reactions  
226 performed in standard extract. Furthermore, when NusG-NTD was titrated from 0.3–5  $\mu$ M,  
227 transcription-translation reactions performed in  $rpoB^{*35}$  extract were significantly more resistant  
228 to inhibition by NusG-NTD than those performed in standard extract.

229 The striking restoration of luciferase activity by backtracking-resistant RNAP indicates  
230 that NusG-NTD- and NusG-F165A-mediated disruption of coupling between RNAP and the lead  
231 ribosome allows uncoupled RNAP to enter into a non-productive backtracked state. Uncoupled  
232 RNAP may elongate more rapidly than the translating lead ribosome and, in doing so, become  
233 prone to backtracking. We conclude that a critical role of NusG is to suppress RNAP  
234 backtracking by coupling RNAP to the lead ribosome.

235 Figure 4 presents a mechanistic model summarizing our findings. This model is  
236 consistent with previous studies by Proshkin *et al.* [1] and Dutta *et al.* [19] suggesting that  
237 translation by the lead ribosome exerts control over the rate of transcription by preventing RNAP  
238 from spontaneously backtracking. Significantly extending these studies, the data we present  
239 here strongly suggests that the lead ribosome prevents RNAP backtracking through a  
240 mechanism in which RNAP is physically tethered to the lead ribosome by NusG. Although

Bailey E.J., *et al.*

241 Turtola and Belogurov have previously reported that NusG exhibits inherent backtracking  
242 suppression activity in an *in vitro*, transcription-only biochemical system composed of purified  
243 components [20], because their system lacked ribosomes and the associated translation  
244 components, whether and how NusG might suppress RNAP backtracking within the context of  
245 transcription-translation coupling had remained unexplored until the present work. We note that  
246 our model does not necessarily exclude the possibility of additional mechanisms through which  
247 the lead ribosome prevents RNAP backtracking, including mechanisms in which RNAP forms  
248 direct, non-NusG-mediated interactions with the lead ribosome, interactions that have been  
249 observed in recent RNAP-ribosome structures [9, 11], at least under certain conditions [7] or  
250 mechanisms relying on stochastic coupling of RNAP to the lead ribosome [21, 22].

251 An advantage of conducting these studies in cellular extracts is that factors beyond  
252 NusG that might play a role in transcription-translation coupling, for example NusA [7], are  
253 included in the reactions. Consequently, straightforward extensions of the *in vitro* biochemical  
254 system described here should allow investigation of the role of such factors in the mechanism  
255 and regulation of transcription-translation coupling. Moreover, during gene expression *in vivo*,  
256 NusG is apparently recruited to a transcription elongation complex that is at some distance from  
257 its transcription promoter [23]. Here again, extension of the *in vitro* biochemical system we  
258 describe here should enable studies of the mechanism through which NusG is recruited to an  
259 elongating RNAP and through which NusG establishes interactions with the RNAP and the lead  
260 ribosome. Such studies should provide greater mechanistic insight into transcription-translation  
261 coupling, guiding the design of relevant structural constructs and prompting further studies into  
262 the structural basis of transcription-translation coupling.

263

## 264 **Materials and Methods**

### 265 ***Bacterial strains***

266 The following strains were used in this study:

Bailey E.J., *et al.*

267 MG1655  $\Delta intR-kilR::Cam^R$  [12]

268 MG1655  $\Delta intR-kilR::Cam^R nusG::Kan^R$

269 MG1655  $\Delta intR-kilR::Cam^R rpoB^*35$

270 The MG1655 wild-type-like strain, MG1655  $\Delta intR-kilR::Cam^R$ , referred to herein as the wildtype  
271 MG1655 parent strain, is an MG1655 strain with an *intR-kilR* deletion that allows for the deletion  
272 of the otherwise essential gene, *nusG* [13]. Originally named RSW485, this strain was first used  
273 in Cardinale *et al.* 2008 and the Supplementary Information for Cardinale *et al.* 2008 therefore  
274 details the construction of the strain [12]. The two MG1655 strains used in the current study  
275 were constructed in the MG1655  $\Delta intR-kilR::Cam^R$  background. The strain herein referred to as  
276 *nusG* KO is MG1655  $\Delta intR-kilR::Cam^R nusG::Kan^R$ . The knock-out of *nusG* was accomplished  
277 as described for the MDS42 *nusG::Kan^R*, RSW422, in Cardinale *et al.* 2008 [12]. The strain  
278 herein referred to as *rpoB*\*35 is MG1655  $\Delta intR-kilR::Cam^R rpoB^*35$ . The *rpoB*\*35 strain carries  
279 a codon mutation in *rpoB*, the gene which encodes for the  $\beta$  subunit of RNAP, that alters one  
280 amino acid residue ( $\beta$  H1244Q) [24, 25].

281

### 282 **Preparation of S30 cellular extracts**

283 A culture of the *nusG* KO strain (to prepare *nusG* KO extract), wildtype MG1655 parent strain  
284 (to prepare standard extract), or the *rpoB*\*35 strain (to prepare *rpoB*\*35 extract) was grown in  
285 Terrific Broth with a 1% glucose supplement at 37 °C to an optical density at 600 nm (OD<sub>600</sub>) of  
286 0.8-1.0 and the culture was subsequently cooled by placing in an ice bath for 1 hr. Cells were  
287 pelleted by centrifugation and washed in Extract Buffer (10 mM  
288 tris(hydroxymethyl)aminomethane (Tris) acetate (OAc) at a pH at 4 °C of 7.5, 1 mM dithiothreitol  
289 (DTT), 14 mM magnesium acetate (Mg(OAc)<sub>2</sub>), and 60 mM potassium chloride (KCl)). Cells  
290 were resuspended in 1 mL of Extract Buffer per 1g of wet cell weight. 250  $\mu$ L Protease Inhibitor  
291 Cocktail (18 mM 4-(2-aminoethyl)benzenesulfonyl fluoride hydrochloride (AEBSF) (Sigma, No.  
292 A8456), 1.7 mM bestatin (Sigma, No. B8385), 290  $\mu$ M pepstatin A (Sigma, No. P4265), and 220

Bailey E.J., *et al.*

293  $\mu\text{M}$  E-64 (Sigma, No. E3132)) per 1g of wet cell weight and 1 Unit of 30 Units/ $\mu\text{L}$  RNase  
294 Inhibitor (from human placenta; New England Biolabs (NEB), No. M0307) per  $\mu\text{L}$  of total volume  
295 was added to the resuspended cell solution. Cells were lysed in a French press, 1  $\mu\text{L}$  of 1 M  
296 DTT per ml of lysate was added to the lysate, and the lysate was gently mixed. The lysate was  
297 centrifuged at 30,000  $\times g$  for 30 min at 4  $^{\circ}\text{C}$ , the supernatant was decanted into a fresh  
298 centrifuge bottle, and the supernatant was then centrifuged a second time at 30,000  $\times g$  for 30  
299 min at 4  $^{\circ}\text{C}$ . The supernatant was then transferred to a dialysis bag (molecular weight cutoff  
300 (MWCO) = 3.5 kDa) and dialyzed three times for 1 hr against 1 L of Extract Buffer at 4  $^{\circ}\text{C}$ ,  
301 replacing the used 1 L of buffer with a fresh 1 L of buffer between each time. The S30 extract  
302 was clarified by centrifugation one last time at 4,000  $\times g$  for 10 min at 4  $^{\circ}\text{C}$ . To quantify the total  
303 concentration of biomolecules in the 30S extract, we measured the ultraviolet (UV) absorbance  
304 of the 30S extract at 280 nm ( $A_{280}$ ) and used  $A_{280}$  Units/ $\mu\text{L}$  as a proxy for the total concentration  
305 of biomolecules (the final *nusG* KO, standard, and *rpoB\*35* extracts used in this study were 162  
306  $A_{280}$  Units/ $\mu\text{L}$ , 287  $A_{280}$  Units/ $\mu\text{L}$ , and 171  $A_{280}$  Units/ $\mu\text{L}$ , respectively). The S30 extract was then  
307 aliquoted, flash-frozen in liquid nitrogen, and stored at  $-80^{\circ}\text{C}$  until use.

308

309 ***Luciferase-encoding plasmids and expression and purification of luciferase-encoding***  
310 ***mRNA***

311 The pBESTluc plasmid was obtained from Promega (No. L1020) and contains the eukaryotic  
312 firefly luciferase gene positioned downstream from a Ptac promoter and a ribosome binding site  
313 [26]. Notably, the luciferase gene encoded by the pBESTluc plasmid lacks an N-utilization (*nut*)  
314 site and therefore does not promote the assembly of an RNAP anti-termination complex. We  
315 constructed the pBESTlucT7 plasmid by replacing the Ptac promoter in the pBESTluc plasmid  
316 with the T7 RNAP promoter. The pBESTluc and pBESTlucT7 plasmids used in this study were  
317 electroporated into *E. coli* XL1-Blue (Agilent) and 10G (Lucigen) electrocompetent cells,  
318 respectively, and purified using the QIAprep Spin Miniprep Kit (No. 27104) or QIAGEN HiSpeed

Bailey E.J., *et al.*

319 Plasmid Maxi Kit (No. 12663), depending on desired scale of yield. The concentration of the  
320 resulting pBESTluc plasmid solution, in  $\mu\text{g}/\mu\text{L}$ , was calculated from the  $A_{260}$ , as measured using  
321 a NanoDrop spectrophotometer (Thermo Fisher Scientific), and an extinction coefficient of 0.020  
322  $(\mu\text{g}/\text{ml})^{-1} \text{ cm}^{-1}$ . To perform transcription-translation reactions, we added purified pBESTluc  
323 plasmid directly to transcription-translation reactions (*vide infra*). To perform translation-only  
324 reactions, we first used the HiScribe™ T7 Quick High Yield RNA Synthesis Kit (NEB, No.  
325 E2050S) to *in vitro* transcribe the pBESTlucT7 plasmid and generate pBESTlucT7 mRNA using  
326 the protocol provided in the manufacturer's instruction manual [27]. Upon completion of  
327 transcription, the reaction was treated with DNase I (NEB, No. M0303S) to degrade the  
328 pBESTlucT7 plasmid. DNase I was then inactivated by adding 2  $\mu\text{l}$  of 0.2 M  
329 ethylenediaminetetraacetic acid (EDTA) per 20  $\mu\text{l}$  T7 transcription reaction and heating at 70 °C  
330 for 10 min. The completeness of the DNA template degradation was confirmed by 5%  
331 denaturing polyacrylamide gel electrophoresis (D-PAGE). Owing to difficulties in further mRNA  
332 purification, to perform translation-only reactions, we added pBESTluc mRNA, as a standard  
333 amount of the T7 RNA transcription reaction product, directly to translation-only reactions (*vide*  
334 *infra*).

335

### 336 ***Over-expression and purification of NusG-WT, NusG-NTD, and NusG-F165A proteins***

337 Purified NusG-WT, NusG-NTD, and NusG-F165A proteins were a generous gift from Prof. Paul  
338 Rösch at the University of Bayreuth. Over-expression and purification of NusG-WT, NusG-NTD,  
339 and NusG-F165A proteins is described in Burmann *et al.* 2011 [14]. Purified NusG-WT and  
340 NusG-F165A were stored in a storage buffer composed of 10 mM Tris hydrochloride (Tris-HCl)  
341 at a pH at room temperature (~23 °C) of 7.5 and 150 mM sodium chloride (NaCl). Purified  
342 NusG-NTD was stored in a storage buffer of 50 mM Tris-HCl at a pH at room temperature (~23  
343 °C) of 7.5 and 150 mM NaCl.

Bailey E.J., *et al.*

344 Using solution NMR spectroscopy experiments [2, 14] and *in vitro* transcription assays  
345 [5], we have previously validated the proper folding and expected biochemical activities of these  
346 purified NusG-WT, NusG-NTD, and NusG-F165A proteins. Moreover, we have shown that  
347 NusG-NTD is toxic when expressed in *E. coli* strains containing endogenous levels of NusG-WT  
348 [3], suggesting that NusG-NTD, and, by extension, NusG-F165A, can bind RNAP in a manner  
349 that competes with NusG-WT. Collectively, these observations support the design of our  
350 transcription-translation and translation-only assays, in which we add excess concentrations of  
351 purified NusG-WT, NusG-NTD, or NusG-F165A to standard extract and assess how these  
352 proteins compete with the endogenous NusG-WT that is found in standard extract.

353

354 ***Transcription-translation reactions, translation-only reactions, luciferase activity assays,***  
355 ***and data analyses***

356 Transcription-translation reactions were performed by combining in an Eppendorf tube  $v_{\text{DNA}}$   $\mu\text{L}$   
357 of a pBESTluc plasmid DNA solution, where  $v_{\text{DNA}}$   $\mu\text{L}$  is the volume of a pBESTluc plasmid  
358 solution at a particular  $\mu\text{g}/\mu\text{L}$  concentration that is required to deliver 2  $\mu\text{g}$  of pBESTluc plasmid  
359 DNA to the reaction; 5  $\mu\text{L}$  of a solution that is 1 mM in each of the 20 essential amino acids  
360 (Promega, No. L4461); 20  $\mu\text{L}$  of Promega S30 Premix without Amino Acids (No. L512A-C);  $v_{\text{S30}}$   
361  $\mu\text{L}$  of S30 cell extract, where  $v_{\text{S30}}$   $\mu\text{L}$  is the volume of S30 extract at a particular  $A_{280}$  Units/ $\mu\text{L}$   
362 concentration that is required to deliver 2,000  $A_{280}$  Units of S30 extract to the reaction; and  $v_{\text{H}_2\text{O}}$   
363  $\mu\text{L}$  Nanopure water ( $\text{H}_2\text{O}$ ), where  $v_{\text{H}_2\text{O}}$   $\mu\text{L}$  is the volume of Nanopure  $\text{H}_2\text{O}$  that is required to  
364 achieve a final reaction volume of 50  $\mu\text{L}$ . Transcription-translation reactions were incubated for  
365 60 minutes at 37 °C and subsequently stopped by incubating on ice for 5 minutes. The  
366 transcription-translation reaction was then shifted to room temperature ( $\sim 23$  °C ); 50  $\mu\text{L}$  of  
367 Promega Steady-Glo Luciferase Assay Reagent (No. E2520) was added to the 50  $\mu\text{L}$   
368 transcription-translation reaction; 20  $\mu\text{L}$  of the resulting 100  $\mu\text{L}$  Luciferase Assay Reagent-  
369 containing reaction mixture was transferred to a white, flat-bottom 96-well plate; the plate was

Bailey E.J., *et al.*

370 incubated for 10 min at room temperature (~23 °C); and, immediately following the 10 min  
371 incubation, the luminescence was quantified in relative light units (RLU) using a Tecan Infinite  
372 200 Multimode Plate Reader.

373 Translation-only reactions were performed in a manner identical to that of transcription-  
374 translation reactions with two exceptions. The first exception was that the  $V_{DNA}$   $\mu$ L of the  
375 pBESTluc plasmid solution was replaced by 6  $\mu$ L of a DNase I-treated T7 transcription reaction  
376 solution (*vide supra*) such that pBESTlucT7 mRNA could be delivered to the reaction. We  
377 accounted for slight variations in the mRNA concentration of individual DNase I-treated T7  
378 transcription reaction solutions by using a single DNase I-treated T7 transcription reaction  
379 solution to perform multiple translation-only reactions in parallel and always including a  
380 'reference' translation-only reaction within each group of the parallelized translation-only  
381 reactions, as described in the next paragraph. The second exception was that the volume of the  
382 100  $\mu$ L Luciferase Assay Reagent-containing reaction mixture that was transferred to the 96-  
383 well plate was increased from 20  $\mu$ l to 80  $\mu$ l in order to make up for the fact that translation-only  
384 reactions generate less luciferase and, correspondingly, lower RLU than transcription-  
385 translation reactions. Because our experiments and analyses make use of a 'reference'  
386 reaction, as described in the following paragraph, it was unnecessary to correct the data for this  
387 difference in the volume of Luciferase Assay Reagent-containing reaction mixture that was  
388 transferred to the plates for the transcription-translation and translation-only reactions.

389 To account for possible preparation-to-preparation, experiment-to-experiment, and/or  
390 day-to-day variations in the concentrations or activities of reaction components, our ability to  
391 reproducibly assemble the reactions, and/or the performance of equipment and instruments and  
392 enable comparison of our results across multiple reaction component preparations,  
393 experiments, and days, we always performed multiple reactions in parallel, in groups of up to 12  
394 reactions, and consistently included corresponding 'reference' reactions within each group of  
395 parallelized reactions. For transcription-translation reactions performed in standard extract, the

Bailey E.J., *et al.*

396 corresponding reference reaction was a transcription-translation reaction performed in standard  
397 extract in the absence of added NusG proteins and BCM. Analogously, for translation-only  
398 reactions performed in standard extract, the corresponding reference reactions was a  
399 translation-only reaction performed in standard extract in the absence of added NusG proteins.  
400 For transcription-translation reactions performed in *rpoB\*35* extract, the corresponding  
401 reference reaction was a transcription-translation reaction performed in *rpoB\*35* extract in the  
402 absence of added NusG proteins. Having defined these reference reactions, the % relative  
403 luciferase activity of each transcription-translation or translation-only reaction performed within a  
404 group of parallelized reactions could be calculated as [(RLU of the transcription-translation or  
405 translation-only reaction performed within a group of parallelized reactions in standard or  
406 *rpoB\*35* extract, in the absence or presence of added NusG proteins, and/or in the absence or  
407 presence of BCM within one group of parallelized reactions) / (RLU of the corresponding  
408 reference reaction performed within the same group of parallelized reactions) × 100]. % relative  
409 luciferase activities calculated in this manner account for possible variations in the  
410 concentrations or activities of assay components, our ability to reproducibly assemble the  
411 reactions, and/or the performance of equipment and instruments and can therefore be  
412 compared across multiple assay component preparations, experiments, and days.

413 Two technical replicates were performed for the translation-only reactions executed in  
414 standard extract in the absence of any added NusG proteins and in the presence of 1 μM added  
415 NusG-WT, NusG-NTD, and NusG-F165A and for the transcription-translation reactions  
416 executed in *rpoB\*35* extract in the presence of NusG-NTD at 5 μM. A minimum of three  
417 technical replicates were performed for all other reactions. Replicates were used to calculate the  
418 mean and the standard deviation of the % relative luciferase activity.

Bailey E.J., *et al.*

419 **References**

- 420 [1] Proshkin S, Rahmouni AR, Mironov A, Nudler E. Cooperation between translating  
421 ribosomes and RNA polymerase in transcription elongation. *Science*. 2010;328:504-8.
- 422 [2] Burmann BM, Schweimer K, Luo X, Wahl MC, Stitt BL, Gottesman ME, et al. A  
423 NusE:NusG complex links transcription and translation. *Science*. 2010;328:501-4.
- 424 [3] Mooney RA, Schweimer K, Rosch P, Gottesman M, Landick R. Two structurally  
425 independent domains of E. coli NusG create regulatory plasticity via distinct interactions  
426 with RNA polymerase and regulators. *Journal of molecular biology*. 2009;391:341-58.
- 427 [4] Washburn RS, Zuber PK, Sun M, Hashem Y, Shen B, Li W, et al. Escherichia coli NusG  
428 Links the Lead Ribosome with the Transcription Elongation Complex. *iScience*.  
429 2020;23:101352.
- 430 [5] Saxena S, Myka KK, Washburn R, Costantino N, Court DL, Gottesman ME. Escherichia  
431 coli transcription factor NusG binds to 70S ribosomes. *Mol Microbiol*. 2018;108:495-504.
- 432 [6] Webster MW, Takacs M, Zhu C, Vidmar V, Eduljee A, Abdelkareem M, et al. Structural  
433 basis of transcription-translation coupling and collision in bacteria. *Science*.  
434 2020;369:1355-9.
- 435 [7] Wang C, Molodtsov V, Firlar E, Kaelber JT, Blaha G, Su M, et al. Structural basis of  
436 transcription-translation coupling. *Science*. 2020;369:1359-65.
- 437 [8] O'Reilly FJ, Xue L, Graziadei A, Sinn L, Lenz S, Tegunov D, et al. In-cell architecture of an  
438 actively transcribing-translating expressome. *Science*. 2020;369:554-7.
- 439 [9] Kohler R, Mooney RA, Mills DJ, Landick R, Cramer P. Architecture of a transcribing-  
440 translating expressome. *Science*. 2017;356:194-7.

Bailey E.J., *et al.*

- 441 [10] Fan H, Conn AB, Williams PB, Diggs S, Hahm J, Gamper HB, Jr., et al. Transcription-  
442 translation coupling: direct interactions of RNA polymerase with ribosomes and ribosomal  
443 subunits. *Nucleic Acids Res.* 2017;45:11043-55.
- 444 [11] Demo G, Rasouly A, Vasilyev N, Svetlov V, Loveland AB, Diaz-Avalos R, et al. Structure  
445 of RNA polymerase bound to ribosomal 30S subunit. *Elife.* 2017;6.
- 446 [12] Cardinale CJ, Washburn RS, Tadigotla VR, Brown LM, Gottesman ME, Nudler E.  
447 Termination factor Rho and its cofactors NusA and NusG silence foreign DNA in *E. coli*.  
448 *Science.* 2008;320:935-8.
- 449 [13] Washburn RS, Gottesman ME. Regulation of transcription elongation and termination.  
450 *Biomolecules.* 2015;5:1063-78.
- 451 [14] Burmann BM, Scheckenhofer U, Schweimer K, Rosch P. Domain interactions of the  
452 transcription-translation coupling factor *Escherichia coli* NusG are intermolecular and  
453 transient. *The Biochemical journal.* 2011;435:783-9.
- 454 [15] Zwiefka A, Kohn H, Widger WR. Transcription termination factor rho: the site of  
455 bicyclomycin inhibition in *Escherichia coli*. *Biochemistry-U.S.* 1993;32:3564-70.
- 456 [16] Vincent F, Openshaw M, Trautwein M, Gaskell SJ, Kohn H, Widger WR. Rho transcription  
457 factor: symmetry and binding of bicyclomycin. *Biochemistry-U.S.* 2000;39:9077-83.
- 458 [17] Trautinger BW, Jaktaji RP, Rusakova E, Lloyd RG. RNA polymerase modulators and DNA  
459 repair activities resolve conflicts between DNA replication and transcription. *Mol Cell.*  
460 2005;19:247-58.
- 461 [18] Kamarthapu V, Epshtein V, Benjamin B, Proshkin S, Mironov A, Cashel M, et al. ppGpp  
462 couples transcription to DNA repair in *E. coli*. *Science.* 2016;352:993-6.

Bailey E.J., *et al.*

- 463 [19] Dutta D, Shatalin K, Epshtein V, Gottesman ME, Nudler E. Linking RNA polymerase  
464 backtracking to genome instability in *E. coli*. *Cell*. 2011;146:533-43.
- 465 [20] Turtola M, Belogurov GA. NusG inhibits RNA polymerase backtracking by stabilizing the  
466 minimal transcription bubble. *Elife*. 2016;5.
- 467 [21] Chen M, Fredrick K. Measures of single- versus multiple-round translation argue against a  
468 mechanism to ensure coupling of transcription and translation. *Proc Natl Acad Sci U S A*.  
469 2018;115:10774-9.
- 470 [22] Li R, Zhang Q, Li J, Shi H. Effects of cooperation between translating ribosome and RNA  
471 polymerase on termination efficiency of the Rho-independent terminator. *Nucleic Acids*  
472 *Res*. 2016;44:2554-63.
- 473 [23] Mooney RA, Davis SE, Peters JM, Rowland JL, Ansari AZ, Landick R. Regulator  
474 trafficking on bacterial transcription units *in vivo*. *Mol Cell*. 2009;33:97-108.
- 475 [24] McGlynn P, Lloyd RG. Modulation of RNA polymerase by (p)ppGpp reveals a RecG-  
476 dependent mechanism for replication fork progression. *Cell*. 2000;101:35-45.
- 477 [25] Trautinger BW, Lloyd RG. Modulation of DNA repair by mutations flanking the DNA  
478 channel through RNA polymerase. *EMBO J*. 2002;21:6944-53.
- 479 [26] Promega Corporation. *E. coli* S30 extract system for circular DNA. 2015. p. 1-17.
- 480 [27] New England BioLabs. Instruction Manual: HiScribe™ T7 Quick High Yield RNA  
481 Synthesis Kit. 2017. p. 1-17.

482

### 483 **Acknowledgements**

484 We would like to thank Dr. Robert S. Washburn for constructing the *nusG* KO, wildtype MG1655  
485 parent, and *rpoB*\*35 strains and Dr. Martin Strauß for performing  $\beta$ -galactosidase-based, *in vivo*

Bailey E.J., *et al.*

486 cell biology experiments. The purified NusG-WT, NusG-NTD, and NusG-F165A proteins used in  
487 this study were a generous gift from Prof. Paul Röche at the University of Bayreuth. This work  
488 was supported by funds to R.L.G. from the National Institutes of Health (NIH) (R01 GM 084288  
489 and R01 GM 137608) and M.E.G. from NIH (R01 GM 37219). E.J.B was supported by a  
490 National Science Foundation Graduate Research Fellowship (DGE 1644869).

491

#### 492 **CRedit Authorship Contribution Statement**

493 **Elizabeth J. Bailey:** Conceptualization, Methodology, Resources, Investigation, Validation,  
494 Formal Analysis, Data Curation, Writing - Original Draft, Writing - Review & Editing,  
495 Visualization, Funding Acquisition. **Max E. Gottesman:** Conceptualization, Methodology,  
496 Resources, Writing - Original Draft, Writing - Review & Editing, Visualization, Supervision,  
497 Project Administration. **Ruben L. Gonzalez, Jr.:** Conceptualization, Methodology, Resources,  
498 Data Curation, Writing - Review & Editing, Visualization, Supervision, Project Administration,  
499 Funding Acquisition.

500

#### 501 **Declaration of Competing Interests**

502 The authors declare no competing interests regarding the contents of this article.

Bailey E.J., *et al.*

503 **Figure Legends**

504 **Figure 1. NusG-mediated tethering of RNAP to the lead ribosome enhances gene**  
505 **expression in transcription-translation reactions.** Bar graph plotting the % relative luciferase  
506 activity of transcription-translation (dark blue bars) and translation-only (light blue bars)  
507 reactions performed using standard extract in the absence of any added NusG proteins (–  
508 NusG) or in the presence of 1  $\mu$ M added NusG-WT (+ WT), NusG-NTD (+ NTD), and NusG-  
509 F165A (+ F165A). The luciferase activities of the transcription-translation and translation-only  
510 reactions in WT, NTD, and F165A are reported relative to those of the transcription-translation  
511 or translation-only reactions, respectively, in – NusG, which are each set to 100%. Error bars  
512 represent the standard deviations of each measurement.

513

514 **Figure 2. Prevention of premature, Rho-dependent transcription termination is not the**  
515 **primary mechanism through which NusG-mediated tethering of RNAP to the lead**  
516 **ribosome enhances gene expression in transcription-translation reactions.** Bar graph  
517 plotting the % relative luciferase activity of transcription-translation reactions performed using  
518 standard extract in the absence of any added NusG proteins and 0  $\mu$ M BCM (– NusG 0), in the  
519 presence of 1  $\mu$ M added NusG-F165A and 0 (+ F165 0), 7 (+ F165 7), or 700 (+ F165 700)  $\mu$ M  
520 BCM. The luciferase activities in + F165 0, + F165 7, and + F165 700 are reported relative to  
521 the luciferase activity of – NusG, which is set to 100%. Error bars represent the standard  
522 deviations of each measurement.

523

524 **Figure 3. Suppression of RNAP backtracking during transcription is the primary**  
525 **mechanism through which NusG-mediated tethering of RNAP to the lead ribosome**  
526 **enhances gene expression in transcription-translation reactions.** Bar graph plotting the %  
527 relative luciferase activity of transcription-translation reactions using performed using standard  
528 (blue bars) or *rpoB\*35* (green bars) extracts in the absence of any added NusG proteins (–

Bailey E.J., *et al.*

529 NusG) or in the presence of 1  $\mu$ M added NusG-NTD (+ NTD) or NusG-F165A (+ F165A). For  
530 the standard and *rpoB*\*35 extracts, the luciferase activities in + NTD or + F165A are reported  
531 relative to the luciferase activities of – NusG in standard or *rpoB*\*35 extracts, respectively, which  
532 are each set to 100%. Error bars represent the standard deviations of each measurement. The  
533 inset is a bar graph plotting the % relative luciferase activity of transcription-translation reactions  
534 using standard or *rpoB*\*35 extracts in the absence of any added NusG proteins (– NusG) or in  
535 the presence of added NusG-NTD at 0.3 (+ NTD 0.3), 1 (+ NTD 1), or 5 (+ NTD 5)  $\mu$ M. For the  
536 standard and *rpoB*\*35 extracts, the luciferase activities of + NTD 0.3, + NTD 1, and + NTD 5 are  
537 reported relative to the luciferase activities of – NusG in standard or *rpoB*\*35 extracts,  
538 respectively, which are each set to 100%. Error bars represent the standard deviations of each  
539 measurement.

540

541 **Figure 4. Mechanistic model showing how NusG-mediated tethering of RNAP to the lead**  
542 **ribosome increases the rate of transcription during transcription-translation coupling. (A)**

543 Transcription and translation in the presence of NusG (green)-mediated tethering of the  
544 transcribing RNAP (teal) to the lead ribosome (wheat and light blue for the small and large  
545 ribosomal subunits, respectively). NusG mediates tethering *via* interactions of the NusG CTD  
546 with the  $\beta'$  and  $\beta$  subunits of RNAP and the NusG NTD with ribosomal protein uS10 within the  
547 small ribosomal subunit. Tethering enhances gene expression through a mechanism in which  
548 translation of the nascent mRNA (red) into protein (orange) by the NusG-tethered lead  
549 ribosome, the direction of which is shown by the solid light grey arrow over the mRNA,  
550 suppresses the tendency of RNAP to enter into a non-productive, backtracked state on the DNA  
551 template (black), thereby increasing the rate of transcription by RNAP, the direction of which is  
552 shown by the solid dark grey arrow over the DNA template. Tethering of RNAP to the lead  
553 ribosome may be further aided by NusA [7] not pictured. **(B)** Transcription and translation in the  
554 absence of NusG-mediated tethering of the transcribing RNAP to the lead ribosome. The lack of

Bailey E.J., *et al.*

555 tethering enables RNAP to enter into the backtracked state, the direction of which is shown by  
556 the dashed dark grey arrow over the DNA template, thereby decreasing the rate of transcription  
557 by RNAP.

Bailey E.J., *et al.*

558 **Figures**

559 **Figure 1**

560

561

562



563

Bailey E.J., *et al.*

564 **Figure 2**

565

566

567

568

569

570



571

Bailey E.J., *et al.*

572 **Figure 3**

573

574



575

576

Bailey E.J., *et al.*

577 **Figure 4**

578

579

580

581

582

583

584

**A**



**B**



585
